# Supplementary material for: Age-Related Differences in Vancomycin-Associated Nephrotoxicity and Efficacy in Methicillin-Resistant Staphylococcus aureus Infection: A Comparative Study between Elderly and Adult Patients
Source: MDPI journal article supplement (doi:10.3390/antibiotics13040324), 2024-04-03
Supplement: s1 [file s1]

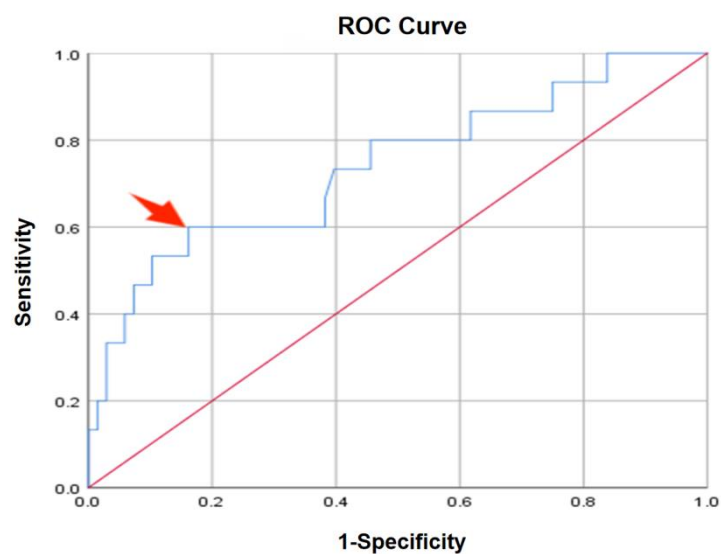

Figure S3. ROC analysis of vancomycin and  $C_{\text{trough}}$  in elderly patients. Red arrow indicates the optimal cutoff. The optimal cutoff value was 20.78 mg/L, with a sensitivity of 60.0% and a specificity of 83.8%, respectively.
