# Supplementary material for: Age-Related Differences in Vancomycin-Associated Nephrotoxicity and Efficacy in Methicillin-Resistant Staphylococcus aureus Infection: A Comparative Study between Elderly and Adult Patients
Source: MDPI journal article supplement (doi:10.3390/antibiotics13040324), 2024-04-03
Supplement: s1 [file s1]

Table S1. Multivariate analysis of risk factors for nephrotoxicity in subgroup of adult patients

| Characteristics                           | Univariate analysis |                | Multivariate analysis |
|-------------------------------------------|---------------------|----------------|-----------------------|
|                                           | OR (95% CI)         | <i>P</i> Value | <i>P</i> Value        |
| Initial serum creatinine (μmol/L)         | 1.012 (1.002-1.022) | 0.019          | 0.974                 |
| Initial eGFR (mL/min/1.73m <sup>2</sup> ) | 0.959 (0.933-0.986) | 0.004          | 0.975                 |
| Daily dose (g)                            | 0.117 (0.022-0.627) | 0.012          | 0.981                 |
| C <sub>trough</sub> (mg/L)                | 1.253 (1.067-1.471) | 0.006          | 0.976                 |
| C <sub>peak</sub> (mg/L)                  | 1.109 (1.032-1.191) | 0.005          | 0.989                 |
| AUC <sub>24</sub> (mg·h/L)                | 1.014 (1.004-1.024) | 0.006          | 0.975                 |
| AUC <sub>24</sub> /MIC                    | 1.004 (1.002-1.007) | 0.002          | 0.989                 |

OR: odds ratio; CI:confidence interval
