# Supplementary figures and images for: Age-Related Differences in Vancomycin-Associated Nephrotoxicity and Efficacy in Methicillin-Resistant Staphylococcus aureus Infection: A Comparative Study between Elderly and Adult Patients
Source: MDPI journal article supplement (doi:10.3390/antibiotics13040324), 2024-04-03

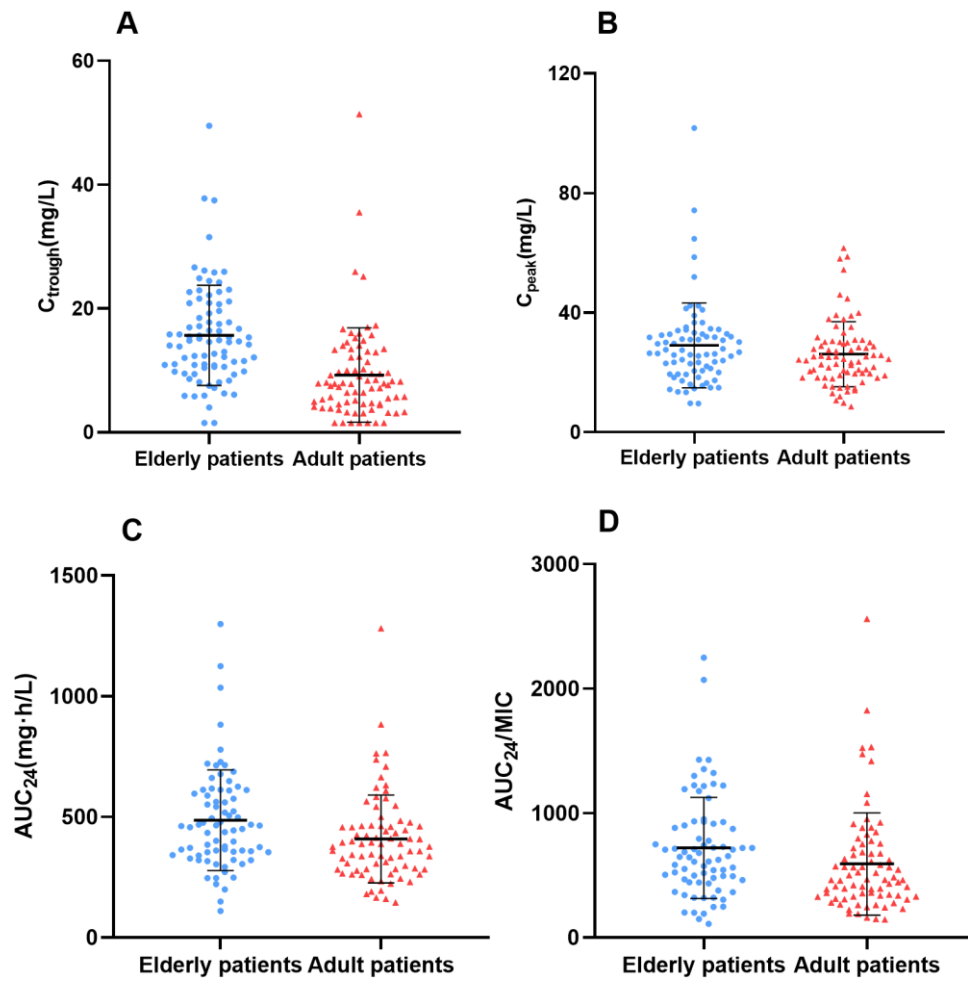

Figure S1. Comparison of  $C_{trough}$  (A),  $C_{trough}$  (B),  $AUC_{24}$  (C) and  $AUC_{24}/MIC$  (D) in elderly and adult patients.

Supplement: s1 [file s1]

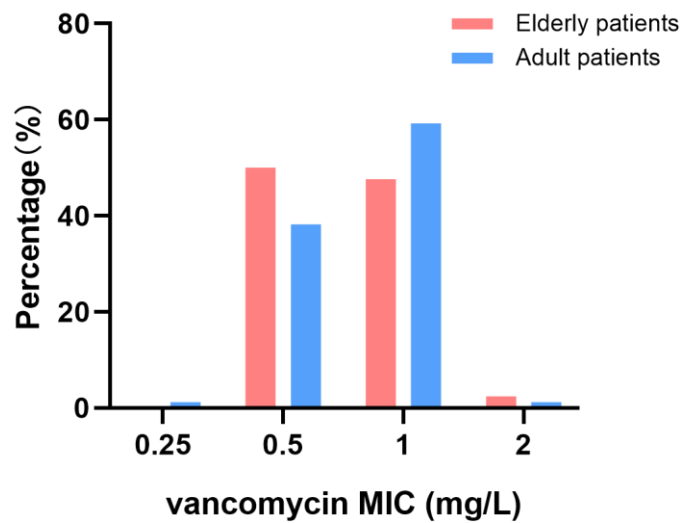

Figure S2. Distribution of vancomycin MIC value in MRSA of elderly and adult patients

Supplement: s1 [file s1]

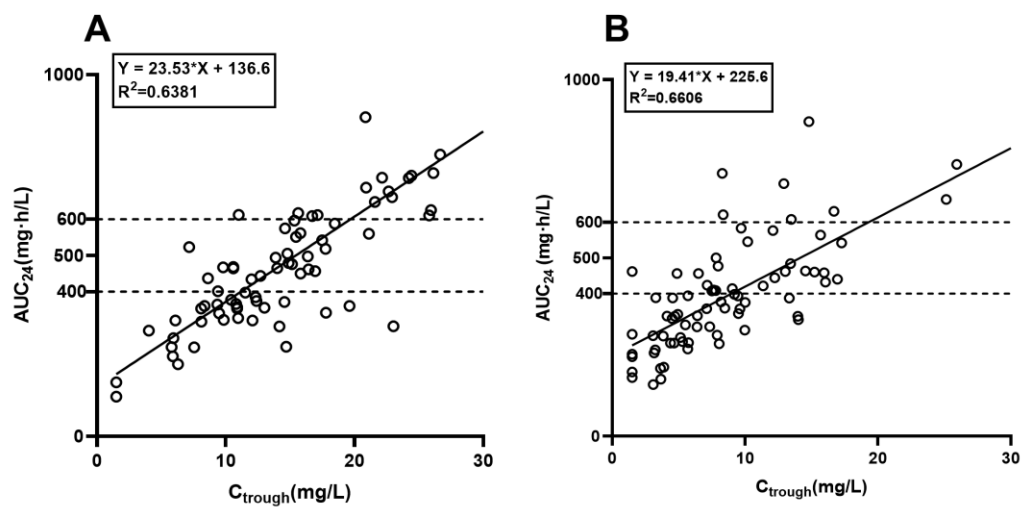

Figure S4. Correlation of  $C_{trough}$  and  $AUC_{24}$  of elderly (A) and adult (B) patients

Supplement: s1 [file s1]
